# Supplementary material
Source: bioRxiv or medRxiv preprint supplement (https://www.biorxiv.org/highwire/filestream/129696/field_highwire_adjunct_files/3/168260-4.pdf)

Average diversity or average number of (non-)synonymous mutations across a 50bp window

1.00  
0.75  
0.50  
0.25  
0.00

Linear clusters of non-synonymous mutations  
— cold  
— hot

Diversity  
Non-synonymous mutations  
Synonymous mutations

Position in *env* gene

0

1000

2000

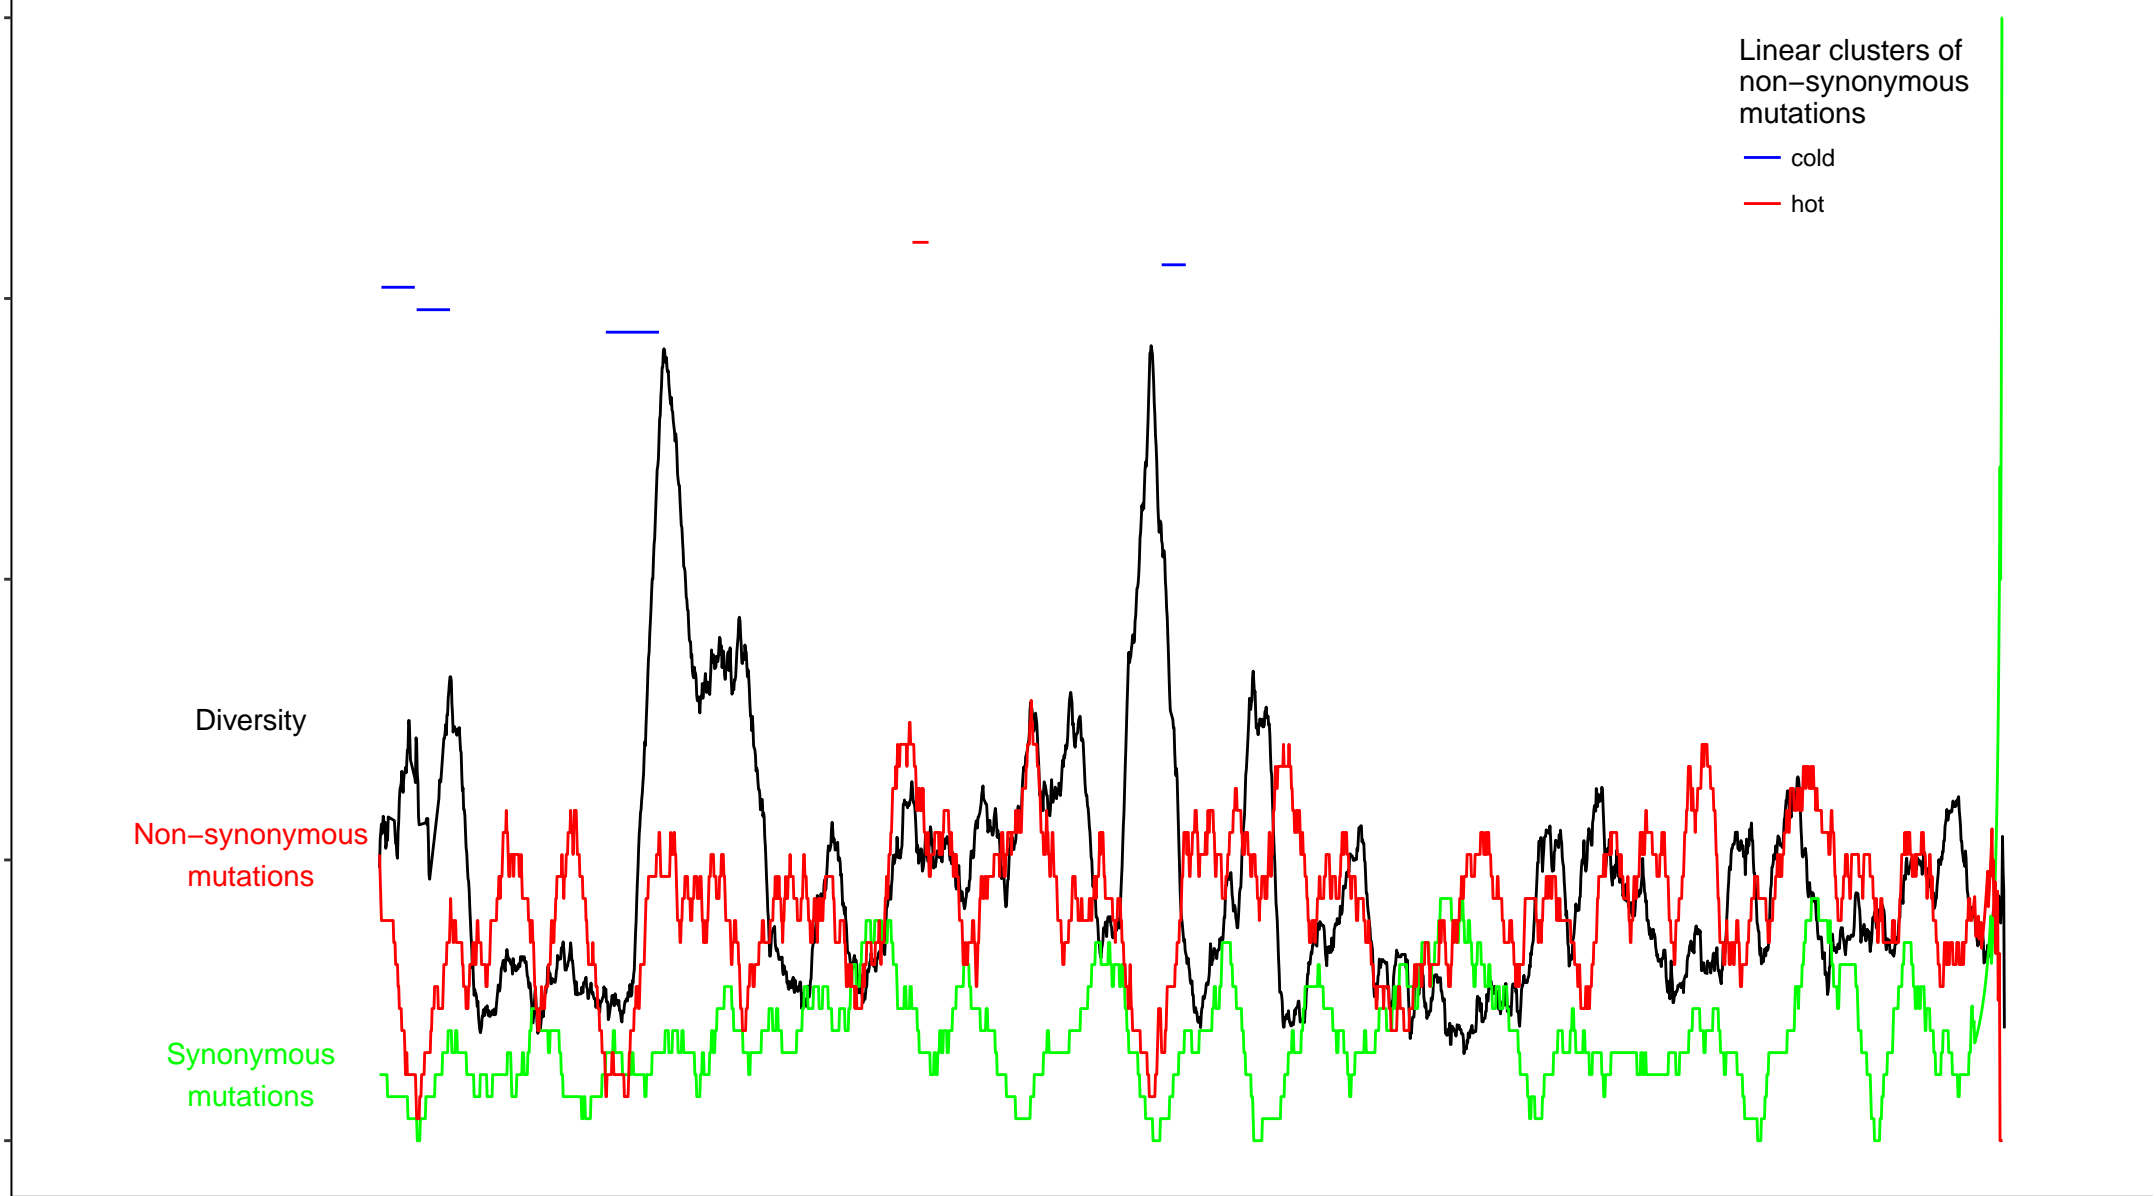

Supplement: Supplementary file [file 168260-4.pdf]
